# Supplementary material
Source: publisher figshare collection journal article supplement (https://acs.figshare.com/ndownloader/files/4284262)

**Supporting Information File**  
**Solid State IR spectrum of nano sided ZnO particles**

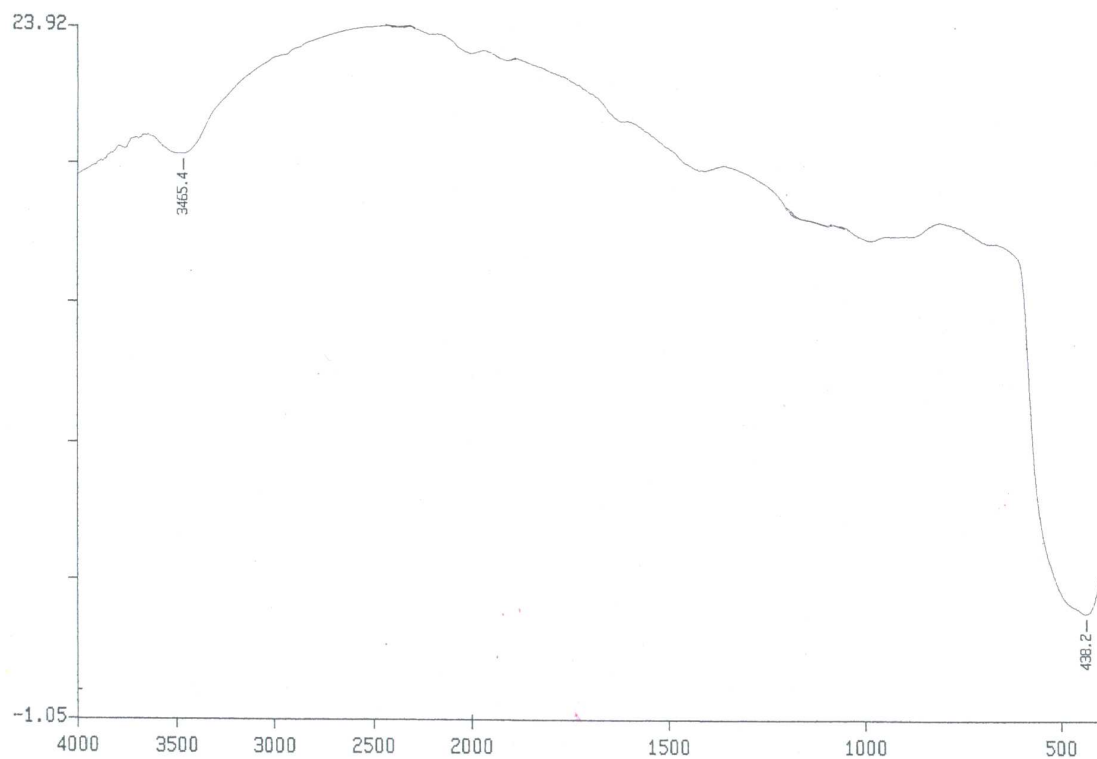

Supplement: Supplementary file 1 [file 4284262]
